# Supplementary material for: Probabilistic association of differentially expressed genes withcis-regulatory elements
Source: HighWire-hosted journal article supplement (doi:10.1101/gr.278598.123), 2024-04-17
Supplement: Supplemental_Data_1.xlsx [file Supplemental_Data_1.xlsx]

## Sheet: Sheet1
#Supplemental Data 1. Data set information. GEO, SRA, or ENCODE accssion numbers are provided for the data sets used in the evaluation of DegCre.
Study Name	PMID	experiment type	time point	replicate	file type	GEO or SRA Accession	ENCODE Exp Accession	File_ENCODE_Accession
McDowell et al.	30097539	ChIPseq_BCL3	0hr	rep1	bam	GSE91283	ENCSR544GUO	ENCFF756QEQ
McDowell et al.	30097539	ChIPseq_BCL3	0hr	rep2	bam	GSE91283	ENCSR544GUO	ENCFF897HCS
McDowell et al.	30097539	ChIPseq_BCL3	0hr	rep3	bam	GSE91283	ENCSR544GUO	ENCFF341IVB
McDowell et al.	30097539	ChIPseq_BCL3	12hr	rep1	bam	GSE91236	ENCSR288EPV	ENCFF670KRA
McDowell et al.	30097539	ChIPseq_BCL3	12hr	rep2	bam	GSE91236	ENCSR288EPV	ENCFF768SFL
McDowell et al.	30097539	ChIPseq_BCL3	4hr	rep1	bam	GSE91264	ENCSR446SPT	ENCFF802OZZ
McDowell et al.	30097539	ChIPseq_BCL3	4hr	rep2	bam	GSE91264	ENCSR446SPT	ENCFF423VZE
McDowell et al.	30097539	ChIPseq_BCL3	8hr	rep1	bam	GSE91307	ENCSR639KFO	ENCFF667HKD
McDowell et al.	30097539	ChIPseq_BCL3	8hr	rep2	bam	GSE91307	ENCSR639KFO	ENCFF550UME
McDowell et al.	30097539	ChIPseq_BCL3	8hr	rep3	bam	GSE91307	ENCSR639KFO	ENCFF115OOW
McDowell et al.	30097539	ChIPseq_CEBPB	0hr	rep1	bam	GSE91324	ENCSR701TCU	ENCFF298YJM
McDowell et al.	30097539	ChIPseq_CEBPB	0hr	rep2	bam	GSE91324	ENCSR701TCU	ENCFF352RDB
McDowell et al.	30097539	ChIPseq_CEBPB	12hr	rep1	bam	GSE91231	ENCSR269IUA	ENCFF227UVU
McDowell et al.	30097539	ChIPseq_CEBPB	12hr	rep2	bam	GSE91231	ENCSR269IUA	ENCFF220BAG
McDowell et al.	30097539	ChIPseq_CEBPB	12hr	rep3	bam	GSE91231	ENCSR269IUA	ENCFF492DBK
McDowell et al.	30097539	ChIPseq_CEBPB	4hr	rep1	bam	GSE91297	ENCSR606ZTC	ENCFF347MNU
McDowell et al.	30097539	ChIPseq_CEBPB	4hr	rep2	bam	GSE91297	ENCSR606ZTC	ENCFF417GPF
McDowell et al.	30097539	ChIPseq_CEBPB	8hr	rep1	bam	GSE91271	ENCSR474DCX	ENCFF263CFP
McDowell et al.	30097539	ChIPseq_CEBPB	8hr	rep2	bam	GSE91271	ENCSR474DCX	ENCFF745OUL
McDowell et al.	30097539	ChIPseq_CEBPB	8hr	rep3	bam	GSE91271	ENCSR474DCX	ENCFF478BBB
McDowell et al.	30097539	ChIPseq_cJun	0hr	rep2	bam	GSE92783	ENCSR048CVK	ENCFF255YNB
McDowell et al.	30097539	ChIPseq_cJun	0hr	rep3	bam	GSE92783	ENCSR048CVK	ENCFF105OTG
McDowell et al.	30097539	ChIPseq_cJun	12hr	rep1	bam	GSE92820	ENCSR664ZHF	ENCFF010YMM
McDowell et al.	30097539	ChIPseq_cJun	12hr	rep2	bam	GSE92820	ENCSR664ZHF	ENCFF979HWA
McDowell et al.	30097539	ChIPseq_cJun	12hr	rep3	bam	GSE92820	ENCSR664ZHF	ENCFF151HUH
McDowell et al.	30097539	ChIPseq_cJun	4hr	rep1	bam	GSE92823	ENCSR708DGM	ENCFF404ENE
McDowell et al.	30097539	ChIPseq_cJun	4hr	rep2	bam	GSE92823	ENCSR708DGM	ENCFF630WBP
McDowell et al.	30097539	ChIPseq_cJun	4hr	rep3	bam	GSE92823	ENCSR708DGM	ENCFF226ABL
McDowell et al.	30097539	ChIPseq_cJun	8hr	rep1	bam	GSE92827	ENCSR783THJ	ENCFF208JDO
McDowell et al.	30097539	ChIPseq_cJun	8hr	rep2	bam	GSE92827	ENCSR783THJ	ENCFF050AWF
McDowell et al.	30097539	ChIPseq_cJun	8hr	rep3	bam	GSE92827	ENCSR783THJ	ENCFF414RDL
McDowell et al.	30097539	ChIPseq_EP300	0hr	rep1	bam	GSE91317	ENCSR686BQM	ENCFF859CJY
McDowell et al.	30097539	ChIPseq_EP300	0hr	rep2	bam	GSE91317	ENCSR686BQM	ENCFF090FBN
McDowell et al.	30097539	ChIPseq_EP300	0hr	rep3	bam	GSE91317	ENCSR686BQM	ENCFF139LRZ
McDowell et al.	30097539	ChIPseq_EP300	12hr	rep1	bam	GSE91205	ENCSR124VXG	ENCFF868IEG
McDowell et al.	30097539	ChIPseq_EP300	12hr	rep2	bam	GSE91205	ENCSR124VXG	ENCFF402OMZ
McDowell et al.	30097539	ChIPseq_EP300	12hr	rep3	bam	GSE91205	ENCSR124VXG	ENCFF963FPY
McDowell et al.	30097539	ChIPseq_EP300	4hr	rep1	bam	GSE91210	ENCSR145YCX	ENCFF366BFI
McDowell et al.	30097539	ChIPseq_EP300	4hr	rep2	bam	GSE91210	ENCSR145YCX	ENCFF951MOH
McDowell et al.	30097539	ChIPseq_EP300	8hr	rep1	bam	GSE91289	ENCSR561ZRE	ENCFF631MTC
McDowell et al.	30097539	ChIPseq_EP300	8hr	rep2	bam	GSE91289	ENCSR561ZRE	ENCFF124CKL
McDowell et al.	30097539	ChIPseq_EP300	8hr	rep3	bam	GSE91289	ENCSR561ZRE	ENCFF775GEU
McDowell et al.	30097539	ChIPseq_GR	0hr	rep2	bam	GSE91275	ENCSR516IVY	ENCFF181HLP
McDowell et al.	30097539	ChIPseq_GR	0hr	rep3	bam	GSE91275	ENCSR516IVY	ENCFF870WJP
McDowell et al.	30097539	ChIPseq_GR	12hr	rep1	bam	GSE91235	ENCSR287FWE	ENCFF221AJW
McDowell et al.	30097539	ChIPseq_GR	12hr	rep2	bam	GSE91235	ENCSR287FWE	ENCFF236LTP
McDowell et al.	30097539	ChIPseq_GR	12hr	rep3	bam	GSE91235	ENCSR287FWE	ENCFF888BBP
McDowell et al.	30097539	ChIPseq_GR	4hr	rep1	bam	GSE91313	ENCSR660RYY	ENCFF368XSU
McDowell et al.	30097539	ChIPseq_GR	4hr	rep2	bam	GSE91313	ENCSR660RYY	ENCFF122YXG
McDowell et al.	30097539	ChIPseq_GR	4hr	rep3	bam	GSE91313	ENCSR660RYY	ENCFF450WID
McDowell et al.	30097539	ChIPseq_GR	8hr	rep1	bam	GSE91322	ENCSR691GRA	ENCFF219MZR
McDowell et al.	30097539	ChIPseq_GR	8hr	rep2	bam	GSE91322	ENCSR691GRA	ENCFF188INN
McDowell et al.	30097539	ChIPseq_GR	8hr	rep3	bam	GSE91322	ENCSR691GRA	ENCFF451ZLK
McDowell et al.	30097539	ChIPseq_H3K27ac	0hr	rep1	bam	GSE91337	ENCSR783SNV	ENCFF393XCS
McDowell et al.	30097539	ChIPseq_H3K27ac	0hr	rep2	bam	GSE91337	ENCSR783SNV	ENCFF117TAC
McDowell et al.	30097539	ChIPseq_H3K27ac	0hr	rep3	bam	GSE91337	ENCSR783SNV	ENCFF273YZW
McDowell et al.	30097539	ChIPseq_H3K27ac	12hr	rep1	bam	GSE91263	ENCSR435JKM	ENCFF491TCE
McDowell et al.	30097539	ChIPseq_H3K27ac	12hr	rep2	bam	GSE91263	ENCSR435JKM	ENCFF646QLP
McDowell et al.	30097539	ChIPseq_H3K27ac	12hr	rep3	bam	GSE91263	ENCSR435JKM	ENCFF436EIX
McDowell et al.	30097539	ChIPseq_H3K27ac	4hr	rep1	bam	GSE91282	ENCSR543ZVZ	ENCFF090QVY
McDowell et al.	30097539	ChIPseq_H3K27ac	4hr	rep2	bam	GSE91282	ENCSR543ZVZ	ENCFF109VEX
McDowell et al.	30097539	ChIPseq_H3K27ac	4hr	rep3	bam	GSE91282	ENCSR543ZVZ	ENCFF706SEA
McDowell et al.	30097539	ChIPseq_H3K27ac	8hr	rep1	bam	GSE91226	ENCSR250EHC	ENCFF674GOX
McDowell et al.	30097539	ChIPseq_H3K27ac	8hr	rep2	bam	GSE91226	ENCSR250EHC	ENCFF360VSU
McDowell et al.	30097539	ChIPseq_H3K4me1	0hr	rep1	bam	GSE91306	ENCSR636PIN	ENCFF890SHO
McDowell et al.	30097539	ChIPseq_H3K4me1	0hr	rep2	bam	GSE91306	ENCSR636PIN	ENCFF102ZYB
McDowell et al.	30097539	ChIPseq_H3K4me1	0hr	rep3	bam	GSE91306	ENCSR636PIN	ENCFF504ORJ
McDowell et al.	30097539	ChIPseq_H3K4me1	12hr	rep1	bam	GSE91278	ENCSR529YKU	ENCFF522NMW
McDowell et al.	30097539	ChIPseq_H3K4me1	12hr	rep2	bam	GSE91278	ENCSR529YKU	ENCFF079BRB
McDowell et al.	30097539	ChIPseq_H3K4me1	12hr	rep3	bam	GSE91278	ENCSR529YKU	ENCFF023YOA
McDowell et al.	30097539	ChIPseq_H3K4me1	4hr	rep1	bam	GSE91363	ENCSR949IDI	ENCFF071TYI
McDowell et al.	30097539	ChIPseq_H3K4me1	4hr	rep2	bam	GSE91363	ENCSR949IDI	ENCFF645BED
McDowell et al.	30097539	ChIPseq_H3K4me1	4hr	rep3	bam	GSE91363	ENCSR949IDI	ENCFF622FCC
McDowell et al.	30097539	ChIPseq_H3K4me1	8hr	rep1	bam	GSE91256	ENCSR404OLV	ENCFF755YDS
McDowell et al.	30097539	ChIPseq_H3K4me1	8hr	rep2	bam	GSE91256	ENCSR404OLV	ENCFF993YJS
McDowell et al.	30097539	ChIPseq_H3K4me1	8hr	rep3	bam	GSE91256	ENCSR404OLV	ENCFF529FRK
McDowell et al.	30097539	ChIPseq_H3K4me3	0hr	rep1	bam	GSE91218	ENCSR203XPU	ENCFF973TUQ
McDowell et al.	30097539	ChIPseq_H3K4me3	0hr	rep2	bam	GSE91218	ENCSR203XPU	ENCFF643FMK
McDowell et al.	30097539	ChIPseq_H3K4me3	0hr	rep3	bam	GSE91218	ENCSR203XPU	ENCFF428UWO
McDowell et al.	30097539	ChIPseq_H3K4me3	12hr	rep1	bam	GSE91361	ENCSR944WVU	ENCFF375KMZ
McDowell et al.	30097539	ChIPseq_H3K4me3	12hr	rep2	bam	GSE91361	ENCSR944WVU	ENCFF435QPD
McDowell et al.	30097539	ChIPseq_H3K4me3	12hr	rep3	bam	GSE91361	ENCSR944WVU	ENCFF121HBN
McDowell et al.	30097539	ChIPseq_H3K4me3	4hr	rep1	bam	GSE91351	ENCSR901AAW	ENCFF228MSV
McDowell et al.	30097539	ChIPseq_H3K4me3	4hr	rep2	bam	GSE91351	ENCSR901AAW	ENCFF255EAX
McDowell et al.	30097539	ChIPseq_H3K4me3	8hr	rep1	bam	GSE91302	ENCSR618MUP	ENCFF621DTD
McDowell et al.	30097539	ChIPseq_H3K4me3	8hr	rep2	bam	GSE91302	ENCSR618MUP	ENCFF686ZYP
McDowell et al.	30097539	DNAse	0hr	rep2	bam	GSE91208	ENCSR136DNA	ENCFF473YHH
McDowell et al.	30097539	DNAse	0hr	rep3	bam	GSE91208	ENCSR136DNA	ENCFF809KIH
McDowell et al.	30097539	DNAse	0hr	rep4	bam	GSE91208	ENCSR136DNA	ENCFF961WXW
McDowell et al.	30097539	DNAse	0hr	rep5	bam	GSE91208	ENCSR136DNA	ENCFF821UUL
McDowell et al.	30097539	DNAse	12hr	rep1	bam	GSE91276	ENCSR523FJT	ENCFF716ZOM
McDowell et al.	30097539	DNAse	12hr	rep2	bam	GSE91276	ENCSR523FJT	ENCFF891IEK
McDowell et al.	30097539	DNAse	12hr	rep3	bam	GSE91276	ENCSR523FJT	ENCFF007EJF
McDowell et al.	30097539	DNAse	12hr	rep5	bam	GSE91276	ENCSR523FJT	ENCFF544MWX
McDowell et al.	30097539	DNAse	4hr	rep2	bam	GSE91295	ENCSR599WJC	ENCFF123UVX
McDowell et al.	30097539	DNAse	4hr	rep3	bam	GSE91295	ENCSR599WJC	ENCFF568TRV
McDowell et al.	30097539	DNAse	4hr	rep4	bam	GSE91295	ENCSR599WJC	ENCFF657QTU
McDowell et al.	30097539	DNAse	4hr	rep5	bam	GSE91295	ENCSR599WJC	ENCFF961DTY
McDowell et al.	30097539	DNAse	8hr	rep1	bam	GSE91312	ENCSR660OQE	ENCFF658OTR
McDowell et al.	30097539	DNAse	8hr	rep2	bam	GSE91312	ENCSR660OQE	ENCFF621JOU
McDowell et al.	30097539	DNAse	8hr	rep3	bam	GSE91312	ENCSR660OQE	ENCFF852EMB
McDowell et al.	30097539	DNAse	8hr	rep4	bam	GSE91312	ENCSR660OQE	ENCFF933LXP
McDowell et al.	30097539	DNAse	8hr	rep5	bam	GSE91312	ENCSR660OQE	ENCFF594PVL
McDowell et al.	30097539	RNAseq	0hr	rep1	featurecounts	GSE91305	ENCSR632DQP	ENCFF778BJF
McDowell et al.	30097539	RNAseq	0hr	rep2	featurecounts	GSE91305	ENCSR632DQP	ENCFF620TAH
McDowell et al.	30097539	RNAseq	0hr	rep3	featurecounts	GSE91305	ENCSR632DQP	ENCFF467SQA
McDowell et al.	30097539	RNAseq	0hr	rep4	featurecounts	GSE91305	ENCSR632DQP	ENCFF082ICE
McDowell et al.	30097539	RNAseq	12hr	rep1	featurecounts	GSE91212	ENCSR154TDP	ENCFF461QOJ
McDowell et al.	30097539	RNAseq	12hr	rep2	featurecounts	GSE91212	ENCSR154TDP	ENCFF900OYE
McDowell et al.	30097539	RNAseq	12hr	rep3	featurecounts	GSE91212	ENCSR154TDP	ENCFF028ISO
McDowell et al.	30097539	RNAseq	12hr	rep4	featurecounts	GSE91212	ENCSR154TDP	ENCFF408AAJ
McDowell et al.	30097539	RNAseq	4hr	rep1	featurecounts	GSE91243	ENCSR326PTW	ENCFF003QRO
McDowell et al.	30097539	RNAseq	4hr	rep2	featurecounts	GSE91243	ENCSR326PTW	ENCFF962ZAV
McDowell et al.	30097539	RNAseq	4hr	rep3	featurecounts	GSE91243	ENCSR326PTW	ENCFF741DHC
McDowell et al.	30097539	RNAseq	4hr	rep4	featurecounts	GSE91243	ENCSR326PTW	ENCFF796DKS
McDowell et al.	30097539	RNAseq	8hr	rep1	featurecounts	GSE91284	ENCSR546PPG	ENCFF078VIQ
McDowell et al.	30097539	RNAseq	8hr	rep2	featurecounts	GSE91284	ENCSR546PPG	ENCFF152FBV
McDowell et al.	30097539	RNAseq	8hr	rep3	featurecounts	GSE91284	ENCSR546PPG	ENCFF547KMT
McDowell et al.	30097539	RNAseq	8hr	rep4	featurecounts	GSE91284	ENCSR546PPG	ENCFF104AUX
Savic et al.	27401066	RNAseq	24hr	all	genecounts	GSE77039	NA	NA
Savic et al.	27401066	RNAseq	48hr	all	genecounts	GSE77039	NA	NA
Savic et al.	27401066	ChIPseq_H3K27ac	ctrl	rep1	fastq	SRR3110399	NA	NA
Savic et al.	27401066	ChIPseq_H3K27ac	ctrl	rep2	fastq	SRR3110400	NA	NA
Savic et al.	27401066	ChIPseq_H3K27ac	24hr	rep1	fastq	SRR3110405	NA	NA
Savic et al.	27401066	ChIPseq_H3K27ac	24hr	rep2	fastq	SRR3110406	NA	NA
Savic et al.	27401066	ChIPseq_H3K27ac	48hr	rep1	fastq	SRR3110407	NA	NA
Savic et al.	27401066	ChIPseq_H3K27ac	48hr	rep2	fastq	SRR3110408	NA	NA
Savic et al.	27401066	ChIPseq_RNA_Pol2	ctrl	rep1	fastq	SRR3110414	NA	NA
Savic et al.	27401066	ChIPseq_RNA_Pol2	ctrl	rep2	fastq	SRR3110415	NA	NA
Savic et al.	27401066	ChIPseq_RNA_Pol2	24hr	rep1	fastq	SRR3110420	NA	NA
Savic et al.	27401066	ChIPseq_RNA_Pol2	24hr	rep2	fastq	SRR3110421	NA	NA
Savic et al.	27401066	ChIPseq_RNA_Pol2	48hr	rep1	fastq	SRR3110422	NA	NA
Savic et al.	27401066	ChIPseq_RNA_Pol2	48hr	rep2	fastq	SRR3110423	NA	NA
Reed et al.	36323252	RNaseq	all	all	table	GSE201354	NA	NA
Reed et al.	36323252	Differential HiC loops	all	all	table	GSE201353	NA	NA
Reed et al.	36323252	ChIPseq_H3K27Ac	0hr	rep1	fastq	SRR18899252	NA	NA
Reed et al.	36323252	ChIPseq_H3K27Ac	0hr	rep2	fastq	SRR18899253	NA	NA
Reed et al.	36323252	ChIPseq_H3K27Ac	30min	rep1	fastq	SRR18899254	NA	NA
Reed et al.	36323252	ChIPseq_H3K27Ac	30min	rep2	fastq	SRR18899255	NA	NA
Reed et al.	36323252	ChIPseq_H3K27Ac	60min	rep1	fastq	SRR18899256	NA	NA
Reed et al.	36323252	ChIPseq_H3K27Ac	60min	rep2	fastq	SRR18899257	NA	NA
Reed et al.	36323252	ChIPseq_H3K27Ac	90min	rep1	fastq	SRR18899258	NA	NA
Reed et al.	36323252	ChIPseq_H3K27Ac	90min	rep2	fastq	SRR18899259	NA	NA
Reed et al.	36323252	ChIPseq_H3K27Ac	2hr	rep1	fastq	SRR18899260	NA	NA
Reed et al.	36323252	ChIPseq_H3K27Ac	2hr	rep2	fastq	SRR18899261	NA	NA
Reed et al.	36323252	ChIPseq_H3K27Ac	4hr	rep1	fastq	SRR18899262	NA	NA
Reed et al.	36323252	ChIPseq_H3K27Ac	4hr	rep2	fastq	SRR18899263	NA	NA
Reed et al.	36323252	ChIPseq_H3K27Ac	6hr	rep1	fastq	SRR18899264	NA	NA
Reed et al.	36323252	ChIPseq_H3K27Ac	6hr	rep2	fastq	SRR18899265	NA	NA
Reed et al.	36323252	ChIPseq_H3K27Ac	24hr	rep1	fastq	SRR18899266	NA	NA
Reed et al.	36323252	ChIPseq_H3K27Ac	24hr	rep2	fastq	SRR18899267	NA	NA
Reed et al.	36323252	ATAC	0hr	rep1	fastq	SRR18899236	NA	NA
Reed et al.	36323252	ATAC	0hr	rep2	fastq	SRR18899237	NA	NA
Reed et al.	36323252	ATAC	30min	rep1	fastq	SRR18899238	NA	NA
Reed et al.	36323252	ATAC	30min	rep2	fastq	SRR18899239	NA	NA
Reed et al.	36323252	ATAC	60min	rep1	fastq	SRR18899240	NA	NA
Reed et al.	36323252	ATAC	60min	rep2	fastq	SRR18899241	NA	NA
Reed et al.	36323252	ATAC	90min	rep1	fastq	SRR18899242	NA	NA
Reed et al.	36323252	ATAC	90min	rep2	fastq	SRR18899243	NA	NA
Reed et al.	36323252	ATAC	2hr	rep1	fastq	SRR18899244	NA	NA
Reed et al.	36323252	ATAC	2hr	rep2	fastq	SRR18899245	NA	NA
Reed et al.	36323252	ATAC	4hr	rep1	fastq	SRR18899246	NA	NA
Reed et al.	36323252	ATAC	4hr	rep2	fastq	SRR18899247	NA	NA
Reed et al.	36323252	ATAC	6hr	rep1	fastq	SRR18899248	NA	NA
Reed et al.	36323252	ATAC	6hr	rep2	fastq	SRR18899249	NA	NA
Reed et al.	36323252	ATAC	24hr	rep1	fastq	SRR18899250	NA	NA
Reed et al.	36323252	ATAC	24hr	rep2	fastq	SRR18899251	NA	NA
Hiatt et al.	36586412	ZMYM3 CETCh-seq	R1274W_variant	rep1	fastq	SRR22077193	NA	NA
Hiatt et al.	36586412	ZMYM3 CETCh-seq	R1274W_variant	rep2	fastq	SRR22077194	NA	NA
Hiatt et al.	36586412	ZMYM3 CETCh-seq	R1274W_control	rep1	fastq	SRR22077195	NA	NA
Hiatt et al.	36586412	ZMYM3 CETCh-seq	R1274W_control	rep2	fastq	SRR22077196	NA	NA
Hiatt et al.	36586412	ZMYM3 CETCh-seq	R688H_variant	rep1	fastq	SRR22077198	NA	NA
Hiatt et al.	36586412	ZMYM3 CETCh-seq	R688H_variant	rep2	fastq	SRR22077199	NA	NA
Hiatt et al.	36586412	ZMYM3 CETCh-seq	R688H_control	rep1	fastq	SRR22077200	NA	NA
Hiatt et al.	36586412	ZMYM3 CETCh-seq	R688H_control	rep2	fastq	SRR22077201	NA	NA
Hiatt et al.	36586412	RNA-seq	R1274W_variant	rep1	fastq	GSM8111628	NA	NA
Hiatt et al.	36586412	RNA-seq	R1274W_variant	rep2	fastq	GSM8111629	NA	NA
Hiatt et al.	36586412	RNA-seq	R1274W_variant	rep3	fastq	GSM8111630	NA	NA
Hiatt et al.	36586412	RNA-seq	R1274W_control	rep1	fastq	GSM8111625	NA	NA
Hiatt et al.	36586412	RNA-seq	R1274W_control	rep2	fastq	GSM8111626	NA	NA
Hiatt et al.	36586412	RNA-seq	R1274W_control	rep3	fastq	GSM8111627	NA	NA
Hiatt et al.	36586412	RNA-seq	R688H_variant	rep1	fastq	GSM8111634	NA	NA
Hiatt et al.	36586412	RNA-seq	R688H_variant	rep2	fastq	GSM8111635	NA	NA
Hiatt et al.	36586412	RNA-seq	R688H_variant	rep3	fastq	GSM8111636	NA	NA
Hiatt et al.	36586412	RNA-seq	R688H_control	rep1	fastq	GSM8111631	NA	NA
Hiatt et al.	36586412	RNA-seq	R688H_control	rep2	fastq	GSM8111632	NA	NA
Hiatt et al.	36586412	RNA-seq	R688H_control	rep3	fastq	GSM8111633	NA	NA
Hiatt et al.	36586412	RNA-seq	all	all	count table	GSE259222	NA	NA
Sanchez-Priego et al.	35649373	ATAC	H1_Glu_0h_rep1	rep1	fastq	SRR18050781	NA	NA
Sanchez-Priego et al.	35649373	ATAC	H1_Glu_early_rep1	rep1	fastq	SRR18050780	NA	NA
Sanchez-Priego et al.	35649373	ATAC	H1_Glu_late_rep1	rep1	fastq	SRR18050779	NA	NA
Sanchez-Priego et al.	35649373	ATAC	H1_Glu_0h_rep2	rep2	fastq	SRR18050778	NA	NA
Sanchez-Priego et al.	35649373	ATAC	H1_Glu_early_rep2	rep2	fastq	SRR18050777	NA	NA
Sanchez-Priego et al.	35649373	ATAC	H1_Glu_late_rep2	rep2	fastq	SRR18050776	NA	NA
Sanchez-Priego et al.	35649373	ATAC	H1_Glu_0h_rep3	rep3	fastq	SRR18050775	NA	NA
Sanchez-Priego et al.	35649373	ATAC	H1_Glu_early_rep3	rep3	fastq	SRR18050774	NA	NA
Sanchez-Priego et al.	35649373	ATAC	H1_Glu_late_rep3	rep3	fastq	SRR18050771	NA	NA
Sanchez-Priego et al.	35649373	ATAC	H1_GABA_0h_rep1	rep1	fastq	SRR18050770	NA	NA
Sanchez-Priego et al.	35649373	ATAC	H1_GABA_early_rep1	rep1	fastq	SRR18050769	NA	NA
Sanchez-Priego et al.	35649373	ATAC	H1_GABA_late_rep1	rep1	fastq	SRR18050768	NA	NA
Sanchez-Priego et al.	35649373	ATAC	H1_GABA_0h_rep2	rep2	fastq	SRR18050767	NA	NA
Sanchez-Priego et al.	35649373	ATAC	H1_GABA_early_rep2	rep2	fastq	SRR18050766	NA	NA
Sanchez-Priego et al.	35649373	ATAC	H1_GABA_late_rep2	rep2	fastq	SRR18050765	NA	NA
Sanchez-Priego et al.	35649373	ATAC	H1_GABA_0h_rep3	rep3	fastq	SRR18050764	NA	NA
Sanchez-Priego et al.	35649373	ATAC	H1_GABA_early_rep3	rep3	fastq	SRR18050773	NA	NA
Sanchez-Priego et al.	35649373	ATAC	H1_GABA_late_rep3	rep3	fastq	SRR18050772	NA	NA
Sanchez-Priego et al.	35649373	H3K27ac_CUTRUN	H1_GABA_H3K27ac_t0_Rep1	rep1	fastq	SRR17900856	NA	NA
Sanchez-Priego et al.	35649373	H3K27ac_CUTRUN	H1_GABA_H3K27ac_early_Rep1	rep1	fastq	SRR17900847	NA	NA
Sanchez-Priego et al.	35649373	H3K27ac_CUTRUN	H1_GABA_H3K27ac_late_Rep1	rep1	fastq	SRR17900846	NA	NA
Sanchez-Priego et al.	35649373	H3K27ac_CUTRUN	H1_GABA_H3K27ac_t0_Rep2	rep2	fastq	SRR17900844	NA	NA
Sanchez-Priego et al.	35649373	H3K27ac_CUTRUN	H1_GABA_H3K27ac_early_Rep2	rep2	fastq	SRR17900843	NA	NA
Sanchez-Priego et al.	35649373	H3K27ac_CUTRUN	H1_GABA_H3K27ac_late_Rep2	rep2	fastq	SRR17900842	NA	NA
Sanchez-Priego et al.	35649373	H3K27ac_CUTRUN	H1_GABA_H3K27ac_t0_Rep3	rep3	fastq	SRR17900840	NA	NA
Sanchez-Priego et al.	35649373	H3K27ac_CUTRUN	H1_GABA_H3K27ac_early_Rep3	rep3	fastq	SRR17900855	NA	NA
Sanchez-Priego et al.	35649373	H3K27ac_CUTRUN	H1_GABA_H3K27ac_late_Rep3	rep3	fastq	SRR17900854	NA	NA
Sanchez-Priego et al.	35649373	H3K27ac_CUTRUN	H1_Glu_H3K27ac_t0_Rep1	rep1	fastq	SRR17900853	NA	NA
Sanchez-Priego et al.	35649373	H3K27ac_CUTRUN	H1_Glu_H3K27ac_early_Rep1	rep1	fastq	SRR17900852	NA	NA
Sanchez-Priego et al.	35649373	H3K27ac_CUTRUN	H1_Glu_H3K27ac_late_Rep1	rep1	fastq	SRR17900851	NA	NA
Sanchez-Priego et al.	35649373	H3K27ac_CUTRUN	H1_Glu_H3K27ac_t0_Rep2	rep2	fastq	SRR17900849	NA	NA
Sanchez-Priego et al.	35649373	H3K27ac_CUTRUN	H1_Glu_H3K27ac_early_Rep2	rep2	fastq	SRR17900848	NA	NA
Sanchez-Priego et al.	35649373	H3K27ac_CUTRUN	H1_Glu_H3K27ac_late_Rep2	rep2	fastq	SRR17900839	NA	NA
Sanchez-Priego et al.	35649373	H3K27ac_CUTRUN	H1_Glu_H3K27ac_t0_Rep3	rep3	fastq	SRR17900838	NA	NA
Sanchez-Priego et al.	35649373	H3K27ac_CUTRUN	H1_Glu_H3K27ac_early_Rep3	rep3	fastq	SRR17900837	NA	NA
Sanchez-Priego et al.	35649373	H3K27ac_CUTRUN	H1_Glu_H3K27ac_late_Rep3	rep3	fastq	SRR17900836	NA	NA
Sanchez-Priego et al.	35649373	H3K27ac_CUTRUN	IPS_GABA_H3K27ac_t0_Rep1	rep1	fastq	SRR17900835	NA	NA
Sanchez-Priego et al.	35649373	H3K27ac_CUTRUN	IPS_GABA_H3K27ac_t0_Rep2	rep2	fastq	SRR17900834	NA	NA
Sanchez-Priego et al.	35649373	H3K27ac_CUTRUN	IPS_GABA_H3K27ac_t0_Rep3	rep3	fastq	SRR17900833	NA	NA
Sanchez-Priego et al.	35649373	H3K27ac_CUTRUN	IPS_GABA_H3K27ac_early_Rep1	rep1	fastq	SRR17900819	NA	NA
Sanchez-Priego et al.	35649373	H3K27ac_CUTRUN	IPS_GABA_H3K27ac_early_Rep2	rep2	fastq	SRR17900818	NA	NA
Sanchez-Priego et al.	35649373	H3K27ac_CUTRUN	IPS_GABA_H3K27ac_early_Rep3	rep3	fastq	SRR17900817	NA	NA
Sanchez-Priego et al.	35649373	H3K27ac_CUTRUN	IPS_GABA_H3K27ac_late_Rep1	rep1	fastq	SRR17900816	NA	NA
Sanchez-Priego et al.	35649373	H3K27ac_CUTRUN	IPS_GABA_H3K27ac_late_Rep2	rep2	fastq	SRR17900831	NA	NA
Sanchez-Priego et al.	35649373	H3K27ac_CUTRUN	IPS_GABA_H3K27ac_late_Rep3	rep3	fastq	SRR17900830	NA	NA
Sanchez-Priego et al.	35649373	H3K27ac_CUTRUN	IPS_Glu_H3K27ac_t0_Rep1	rep1	fastq	SRR17900829	NA	NA
Sanchez-Priego et al.	35649373	H3K27ac_CUTRUN	IPS_Glu_H3K27ac_t0_Rep2	rep2	fastq	SRR17900828	NA	NA
Sanchez-Priego et al.	35649373	H3K27ac_CUTRUN	IPS_Glu_H3K27ac_t0_Rep3	rep3	fastq	SRR17900827	NA	NA
Sanchez-Priego et al.	35649373	H3K27ac_CUTRUN	IPS_Glu_H3K27ac_early_Rep1	rep1	fastq	SRR17900813	NA	NA
Sanchez-Priego et al.	35649373	H3K27ac_CUTRUN	IPS_Glu_H3K27ac_early_Rep2	rep2	fastq	SRR17900812	NA	NA
Sanchez-Priego et al.	35649373	H3K27ac_CUTRUN	IPS_Glu_H3K27ac_early_Rep3	rep3	fastq	SRR17900811	NA	NA
Sanchez-Priego et al.	35649373	H3K27ac_CUTRUN	IPS_Glu_H3K27ac_late_Rep1	rep1	fastq	SRR17900810	NA	NA
Sanchez-Priego et al.	35649373	H3K27ac_CUTRUN	IPS_Glu_H3K27ac_late_Rep2	rep2	fastq	SRR17900809	NA	NA
Sanchez-Priego et al.	35649373	H3K27ac_CUTRUN	IPS_Glu_H3K27ac_late_Rep3	rep3	fastq	SRR17900808	NA	NA
Sanchez-Priego et al.	35649373	RNA-seq	all	all	RAW.tar	GSE196855	NA	NA
Rogers et al.	38232730	snRNA-seq	day0	rep1	fastq	SRX19761091	NA	NA
Rogers et al.	38232730	snRNA-seq	day7	rep1	fastq	SRX19761092	NA	NA
Rogers et al.	38232730	snRNA-seq	day14	rep1	fastq	SRX19761093	NA	NA
Rogers et al.	38232730	snATAC-seq	day0	rep1	fastq	SRX19761094	NA	NA
Rogers et al.	38232730	snATAC-seq	day7	rep1	fastq	SRX19761095	NA	NA
Rogers et al.	38232730	snATAC-seq	day14	rep1	fastq	SRX19761096	NA	NA
Nasser et al.	33828297	CRISPR_results	Supp Table 5	all	tsv	NA	NA	NA
Gasperini et al.	30849375	CRISPR_results	GSE120861_all_deg_results.at_scale.txt	all	txt	GSE120861	NA	NA
