# Supplementary material for: Probabilistic association of differentially expressed genes withcis-regulatory elements
Source: HighWire-hosted journal article supplement (doi:10.1101/gr.278598.123), 2024-04-17
Supplement: Supplemental_Data_3.xlsx [file Supplemental_Data_3.xlsx]

## Sheet: compareNasserSummStats
#Supplemental Data 3. Peformance summary of DegCre, ABC, or Nearest DEG predictions compared to CRISPR data from Nasser et al. "analysisType" defines the type of prediction. "nReg" is the number of associations that are "regulated" in the CRISPR data. "TotAssocs" is the total number of intersecting associations. "best Thresh", "bestPPV", and "best TPR" are the values at the highest F1-score.
dataSet	expName	analysisType	ROCauc	PRauc	zeroSkill	nReg	TotAssocs	bestThresh	bestPPV	bestTPR	wilcoxP	wilcoxStat
Hiatt et al. ZMYM3_CETCh_CONCORD	R1274WmutVsCntrl	DegCre	NA	NA	NA	NA	NA	NA	NA	NA	NA	NA
Hiatt et al. ZMYM3_CETCh_CONCORD	R1274WmutVsCntrl	Nearest	NA	NA	NA	NA	NA	NA	NA	NA	NA	NA
Hiatt et al. ZMYM3_CETCh_CONCORD	R1274WmutVsCntrl	ABC	NA	NA	NA	NA	NA	NA	NA	NA	NA	NA
Hiatt et al. ZMYM3_CETCh_CONCORD	R688HmutVsCntrl	DegCre	NA	NA	NA	NA	NA	NA	NA	NA	NA	NA
Hiatt et al. ZMYM3_CETCh_CONCORD	R688HmutVsCntrl	Nearest	NA	NA	NA	NA	NA	NA	NA	NA	NA	NA
Hiatt et al. ZMYM3_CETCh_CONCORD	R688HmutVsCntrl	ABC	NA	NA	NA	NA	NA	NA	NA	NA	NA	NA
Hiatt et al. ZMYM3_CETCh_DISCORD	R1274WmutVsCntrl	DegCre	NA	NA	NA	NA	NA	NA	NA	NA	NA	NA
Hiatt et al. ZMYM3_CETCh_DISCORD	R1274WmutVsCntrl	Nearest	NA	NA	NA	NA	NA	NA	NA	NA	NA	NA
Hiatt et al. ZMYM3_CETCh_DISCORD	R1274WmutVsCntrl	ABC	NA	NA	NA	NA	NA	NA	NA	NA	NA	NA
Hiatt et al. ZMYM3_CETCh_DISCORD	R688HmutVsCntrl	DegCre	NA	NA	NA	NA	NA	NA	NA	NA	NA	NA
Hiatt et al. ZMYM3_CETCh_DISCORD	R688HmutVsCntrl	Nearest	NA	NA	NA	NA	NA	NA	NA	NA	NA	NA
Hiatt et al. ZMYM3_CETCh_DISCORD	R688HmutVsCntrl	ABC	NA	NA	NA	NA	NA	NA	NA	NA	NA	NA
Hiatt et al. ZMYM3_CETCh	R1274WmutVsCntrl	DegCre	NA	NA	NA	NA	NA	NA	NA	NA	NA	NA
Hiatt et al. ZMYM3_CETCh	R1274WmutVsCntrl	Nearest	NA	NA	NA	NA	NA	NA	NA	NA	NA	NA
Hiatt et al. ZMYM3_CETCh	R1274WmutVsCntrl	ABC	NA	NA	NA	NA	NA	NA	NA	NA	NA	NA
Hiatt et al. ZMYM3_CETCh	R688HmutVsCntrl	DegCre	NA	NA	NA	NA	NA	NA	NA	NA	NA	NA
Hiatt et al. ZMYM3_CETCh	R688HmutVsCntrl	Nearest	NA	NA	NA	NA	NA	NA	NA	NA	NA	NA
Hiatt et al. ZMYM3_CETCh	R688HmutVsCntrl	ABC	NA	NA	NA	NA	NA	NA	NA	NA	NA	NA
Savic et al. H3K27ac	Rosig_24hr	DegCre	0.886831	0.396731	0.0454545	9	198	0.179151	0.625	0.555556	4.51172e-05	192.5
Savic et al. H3K27ac	Rosig_24hr	Nearest	0.619342	0.104821	0.0454545	9	198	0.238232	0.148148	0.444444	0.0621346	647.5
Savic et al. H3K27ac	Rosig_24hr	ABC	0.824221	0.41671	0.0454545	9	198	0.047508	0.833333	0.555556	0.000517607	299
Savic et al. H3K27ac	Rosig_48hr	DegCre	0.822322	0.325195	0.0738636	13	176	0.204139	0.5625	0.692308	5.54207e-05	376.5
Savic et al. H3K27ac	Rosig_48hr	Nearest	0.561586	0.13671	0.0738636	13	176	0.636723	0.333333	0.307692	0.164701	929
Savic et al. H3K27ac	Rosig_48hr	ABC	0.894762	0.663876	0.0738636	13	176	0.047508	1	0.538462	1.12876e-06	223
Savic et al. RNA_Pol2	Rosig_24hr	DegCre	0.83889	0.375552	0.111959	44	393	0.165939	0.553571	0.704545	1.1538e-13	2474
Savic et al. RNA_Pol2	Rosig_24hr	Nearest	0.444224	0.102853	0.111959	44	393	0	0.111959	1	0.918481	8534.5
Savic et al. RNA_Pol2	Rosig_24hr	ABC	0.936246	0.785243	0.111959	44	393	0.022997	0.809524	0.772727	1.97566e-21	979
Savic et al. RNA_Pol2	Rosig_48hr	DegCre	0.780525	0.296608	0.0741758	27	364	0.267991	0.611111	0.407407	6.1166e-07	1997
Savic et al. RNA_Pol2	Rosig_48hr	Nearest	0.717606	0.17462	0.0741758	27	364	0.0259752	0.165217	0.703704	3.19183e-06	2569.5
Savic et al. RNA_Pol2	Rosig_48hr	ABC	0.909551	0.648817	0.0741758	27	364	0.031722	0.789474	0.555556	7.06532e-13	823
Reed et al. ATAC	minute30	DegCre	0.985119	0.0806277	0.127273	7	55	0.0966788	1	0.857143	1.97404e-05	5
Reed et al. ATAC	minute30	Nearest	0.952381	0.40974	0.127273	7	55	0.956204	0.75	0.857143	1.18879e-05	16
Reed et al. ATAC	minute30	ABC	0.985119	0.630782	0.127273	7	55	0.053119	1	0.714286	2.02998e-05	5
Reed et al. ATAC	min60	DegCre	0.994513	0.853276	0.1	9	90	0.0579268	1	0.888889	6.39863e-07	4
Reed et al. ATAC	min60	Nearest	0.960219	0.514347	0.1	9	90	2.41323	0.642857	1	1.45148e-07	29
Reed et al. ATAC	min60	ABC	0.984911	0.780677	0.1	9	90	0.053119	1	0.666667	1.02805e-06	11
Reed et al. ATAC	min90	DegCre	0.935163	0.669701	0.168919	50	296	0.0934024	0.754386	0.86	1.42502e-22	797.5
Reed et al. ATAC	min90	Nearest	0.694837	0.330859	0.168919	50	296	1.1019	0.347368	0.66	6.06387e-06	3753.5
Reed et al. ATAC	min90	ABC	0.929919	0.746488	0.168919	50	296	0.031667	0.911765	0.62	4.69937e-22	862
Reed et al. ATAC	min120	DegCre	0.913362	0.667748	0.128655	66	513	0.167238	0.823529	0.636364	1.00461e-27	2556
Reed et al. ATAC	min120	Nearest	0.660345	0.250252	0.128655	66	513	2.99216	0.428571	0.409091	3.20852e-06	10020.5
Reed et al. ATAC	min120	ABC	0.92909	0.757268	0.128655	66	513	0.031667	0.911111	0.621212	1.02378e-29	2092
Reed et al. ATAC	min240	DegCre	0.943417	0.680442	0.126733	64	505	0.283612	0.768116	0.828125	9.03686e-31	1597
Reed et al. ATAC	min240	Nearest	0.765359	0.432489	0.126733	64	505	0.221336	0.4375	0.65625	2.34686e-20	6622.5
Reed et al. ATAC	min240	ABC	0.945454	0.785845	0.126733	64	505	0.031667	0.88	0.6875	4.97685e-31	1539.5
Reed et al. ATAC	min360	DegCre	0.933996	0.700676	0.132328	79	597	0.266218	0.615385	0.911392	8.19419e-36	2701
Reed et al. ATAC	min360	Nearest	0.805361	0.464486	0.132328	79	597	0.0451428	0.44697	0.746835	7.54486e-33	7965
Reed et al. ATAC	min360	ABC	0.925456	0.729022	0.132328	79	597	0.018038	0.642105	0.772152	1.72121e-34	3050.5
Reed et al. ATAC	min1440	DegCre	0.943074	0.634895	0.0787254	84	1067	0.428973	0.741176	0.75	8.2788e-42	4700.5
Reed et al. ATAC	min1440	Nearest	0.795887	0.434821	0.0787254	84	1067	0.959713	0.634146	0.619048	1.55589e-60	16854
Reed et al. ATAC	min1440	ABC	0.930255	0.653594	0.0787254	84	1067	0.031667	0.723077	0.559524	1.5361e-39	5759
Reed et al. H3K27ac	minute30	DegCre	0.96875	0.197463	0.333333	8	24	0.0471969	0.875	0.875	0.000118968	4
Reed et al. H3K27ac	minute30	Nearest	0.90625	0.6125	0.333333	8	24	24.9795	0.8	1	0.000734342	12
Reed et al. H3K27ac	minute30	ABC	0.992188	0.735243	0.333333	8	24	0.012978	0.888889	1	6.43344e-05	1
Reed et al. H3K27ac	min60	DegCre	0.943478	0.822548	0.30303	10	33	0.0682582	1	0.8	3.30708e-05	13
Reed et al. H3K27ac	min60	Nearest	0.830435	0.466152	0.30303	10	33	6.77511	0.666667	1	0.00140204	39
Reed et al. H3K27ac	min60	ABC	0.995652	0.890455	0.30303	10	33	0.012978	0.909091	1	4.35626e-06	1
Reed et al. H3K27ac	min90	DegCre	0.879404	0.678551	0.237154	60	253	0.0646589	0.533333	0.933333	3.36766e-19	1396.5
Reed et al. H3K27ac	min90	Nearest	0.621373	0.393063	0.237154	60	253	4.72783	0.315508	0.983333	0.00225695	4384.5
Reed et al. H3K27ac	min90	ABC	0.924352	0.745581	0.237154	60	253	0.014099	0.6	0.9	1.62699e-23	876
Reed et al. H3K27ac	min120	DegCre	0.860788	0.713349	0.228916	76	332	0.176057	0.910714	0.671053	6.15358e-22	2708.5
Reed et al. H3K27ac	min120	Nearest	0.676372	0.406488	0.228916	76	332	2.18586	0.320346	0.973684	1.3469e-06	6296.5
Reed et al. H3K27ac	min120	ABC	0.908203	0.714699	0.228916	76	332	0.014099	0.591304	0.894737	1.57638e-27	1786
Reed et al. H3K27ac	min240	DegCre	0.885294	0.632058	0.166189	58	349	0.245364	0.556962	0.758621	9.33042e-21	1936
Reed et al. H3K27ac	min240	Nearest	0.818699	0.462543	0.166189	58	349	1.19802	0.389313	0.87931	5.93054e-18	3060
Reed et al. H3K27ac	min240	ABC	0.90381	0.621271	0.166189	58	349	0.02042	0.578947	0.758621	1.32384e-22	1623.5
Reed et al. H3K27ac	min360	DegCre	0.900862	0.7125	0.187805	77	410	0.282247	0.570248	0.896104	2.67699e-28	2542
Reed et al. H3K27ac	min360	Nearest	0.846866	0.508623	0.187805	77	410	1.21666	0.518797	0.896104	1.22081e-27	3926.5
Reed et al. H3K27ac	min360	ABC	0.91615	0.699342	0.187805	77	410	0.030144	0.75	0.662338	2.45727e-30	2150
Reed et al. H3K27ac	min1440	DegCre	0.946971	0.796503	0.139357	91	653	0.50434	0.835443	0.725275	5.61857e-43	2712
Reed et al. H3K27ac	min1440	Nearest	0.89273	0.547618	0.139357	91	653	2.0226	0.606061	0.879121	4.32839e-59	5486
Reed et al. H3K27ac	min1440	ABC	0.913994	0.652233	0.139357	91	653	0.030144	0.725	0.637363	3.73647e-37	4398.5
Sanchez-Priego et al. ATAC	H1_Glu_early	DegCre	NA	NA	NA	NA	NA	NA	NA	NA	NA	NA
Sanchez-Priego et al. ATAC	H1_Glu_early	Nearest	NA	NA	NA	NA	NA	NA	NA	NA	NA	NA
Sanchez-Priego et al. ATAC	H1_Glu_early	ABC	NA	NA	NA	NA	NA	NA	NA	NA	NA	NA
Sanchez-Priego et al. ATAC	H1_Glu_late	DegCre	NA	NA	NA	NA	NA	NA	NA	NA	NA	NA
Sanchez-Priego et al. ATAC	H1_Glu_late	Nearest	NA	NA	NA	NA	NA	NA	NA	NA	NA	NA
Sanchez-Priego et al. ATAC	H1_Glu_late	ABC	NA	NA	NA	NA	NA	NA	NA	NA	NA	NA
Sanchez-Priego et al. ATAC	H1_Gaba_early	DegCre	NA	NA	NA	NA	NA	NA	NA	NA	NA	NA
Sanchez-Priego et al. ATAC	H1_Gaba_early	Nearest	NA	NA	NA	NA	NA	NA	NA	NA	NA	NA
Sanchez-Priego et al. ATAC	H1_Gaba_early	ABC	NA	NA	NA	NA	NA	NA	NA	NA	NA	NA
Sanchez-Priego et al. ATAC	H1_Gaba_late	DegCre	0.891786	0.310959	0.0992366	13	131	0.0962254	0.361111	1	1.88881e-06	166
Sanchez-Priego et al. ATAC	H1_Gaba_late	Nearest	0.552803	0.136517	0.0992366	13	131	0	0.0992366	1	0.144286	686
Sanchez-Priego et al. ATAC	H1_Gaba_late	ABC	0.926988	0.512957	0.0992366	13	131	0.018306	0.5625	0.692308	2.3454e-07	112
Sanchez-Priego et al. H3K27ac_CUTRUN	H1_Glu_early	DegCre	NA	NA	NA	NA	NA	NA	NA	NA	NA	NA
Sanchez-Priego et al. H3K27ac_CUTRUN	H1_Glu_early	Nearest	NA	NA	NA	NA	NA	NA	NA	NA	NA	NA
Sanchez-Priego et al. H3K27ac_CUTRUN	H1_Glu_early	ABC	NA	NA	NA	NA	NA	NA	NA	NA	NA	NA
Sanchez-Priego et al. H3K27ac_CUTRUN	H1_Glu_late	DegCre	NA	NA	NA	NA	NA	NA	NA	NA	NA	NA
Sanchez-Priego et al. H3K27ac_CUTRUN	H1_Glu_late	Nearest	NA	NA	NA	NA	NA	NA	NA	NA	NA	NA
Sanchez-Priego et al. H3K27ac_CUTRUN	H1_Glu_late	ABC	NA	NA	NA	NA	NA	NA	NA	NA	NA	NA
Sanchez-Priego et al. H3K27ac_CUTRUN	H1_Gaba_early	DegCre	NA	NA	NA	NA	NA	NA	NA	NA	NA	NA
Sanchez-Priego et al. H3K27ac_CUTRUN	H1_Gaba_early	Nearest	NA	NA	NA	NA	NA	NA	NA	NA	NA	NA
Sanchez-Priego et al. H3K27ac_CUTRUN	H1_Gaba_early	ABC	NA	NA	NA	NA	NA	NA	NA	NA	NA	NA
Sanchez-Priego et al. H3K27ac_CUTRUN	H1_Gaba_late	DegCre	0.960129	0.495556	0.0645161	8	124	0.176356	0.75	0.75	7.18212e-06	37
Sanchez-Priego et al. H3K27ac_CUTRUN	H1_Gaba_late	Nearest	0.729526	0.165212	0.0645161	8	124	0.100036	0.294118	0.625	0.000150172	251
Sanchez-Priego et al. H3K27ac_CUTRUN	H1_Gaba_late	ABC	0.970905	0.71468	0.0645161	8	124	0.065267	0.857143	0.75	4.50427e-06	27
Sanchez-Priego et al. H3K27ac_CUTRUN	F2_Glu_early	DegCre	NA	NA	NA	NA	NA	NA	NA	NA	NA	NA
Sanchez-Priego et al. H3K27ac_CUTRUN	F2_Glu_early	Nearest	NA	NA	NA	NA	NA	NA	NA	NA	NA	NA
Sanchez-Priego et al. H3K27ac_CUTRUN	F2_Glu_early	ABC	NA	NA	NA	NA	NA	NA	NA	NA	NA	NA
Sanchez-Priego et al. H3K27ac_CUTRUN	F2_Glu_late	DegCre	NA	NA	NA	NA	NA	NA	NA	NA	NA	NA
Sanchez-Priego et al. H3K27ac_CUTRUN	F2_Glu_late	Nearest	NA	NA	NA	NA	NA	NA	NA	NA	NA	NA
Sanchez-Priego et al. H3K27ac_CUTRUN	F2_Glu_late	ABC	NA	NA	NA	NA	NA	NA	NA	NA	NA	NA
Sanchez-Priego et al. H3K27ac_CUTRUN	F2_Gaba_early	DegCre	NA	NA	NA	NA	NA	NA	NA	NA	NA	NA
Sanchez-Priego et al. H3K27ac_CUTRUN	F2_Gaba_early	Nearest	NA	NA	NA	NA	NA	NA	NA	NA	NA	NA
Sanchez-Priego et al. H3K27ac_CUTRUN	F2_Gaba_early	ABC	NA	NA	NA	NA	NA	NA	NA	NA	NA	NA
Sanchez-Priego et al. H3K27ac_CUTRUN	F2_Gaba_late	DegCre	NA	NA	NA	NA	NA	NA	NA	NA	NA	NA
Sanchez-Priego et al. H3K27ac_CUTRUN	F2_Gaba_late	Nearest	NA	NA	NA	NA	NA	NA	NA	NA	NA	NA
Sanchez-Priego et al. H3K27ac_CUTRUN	F2_Gaba_late	ABC	NA	NA	NA	NA	NA	NA	NA	NA	NA	NA
McDowell et al. ChIPseq_BCL3	twoHr	DegCre	NA	NA	NA	NA	NA	NA	NA	NA	NA	NA
McDowell et al. ChIPseq_BCL3	twoHr	Nearest	NA	NA	NA	NA	NA	NA	NA	NA	NA	NA
McDowell et al. ChIPseq_BCL3	twoHr	ABC	NA	NA	NA	NA	NA	NA	NA	NA	NA	NA
McDowell et al. ChIPseq_BCL3	fourHr	DegCre	NA	NA	NA	NA	NA	NA	NA	NA	NA	NA
McDowell et al. ChIPseq_BCL3	fourHr	Nearest	NA	NA	NA	NA	NA	NA	NA	NA	NA	NA
McDowell et al. ChIPseq_BCL3	fourHr	ABC	NA	NA	NA	NA	NA	NA	NA	NA	NA	NA
McDowell et al. ChIPseq_BCL3	eightHr	DegCre	NA	NA	NA	NA	NA	NA	NA	NA	NA	NA
McDowell et al. ChIPseq_BCL3	eightHr	Nearest	NA	NA	NA	NA	NA	NA	NA	NA	NA	NA
McDowell et al. ChIPseq_BCL3	eightHr	ABC	NA	NA	NA	NA	NA	NA	NA	NA	NA	NA
McDowell et al. ChIPseq_BCL3	twelveHR	DegCre	0.888889	0.307285	0.105263	6	57	0.089839	0.461538	1	0.00102221	34
McDowell et al. ChIPseq_BCL3	twelveHR	Nearest	0.431373	0.0526316	0.105263	6	57	0	0.105263	1	0.836595	174
McDowell et al. ChIPseq_BCL3	twelveHR	ABC	0.993464	0.776984	0.105263	6	57	0.039714	0.857143	1	4.52316e-05	2
McDowell et al. ChIPseq_CEBPB	twoHr	DegCre	NA	NA	NA	NA	NA	NA	NA	NA	NA	NA
McDowell et al. ChIPseq_CEBPB	twoHr	Nearest	NA	NA	NA	NA	NA	NA	NA	NA	NA	NA
McDowell et al. ChIPseq_CEBPB	twoHr	ABC	NA	NA	NA	NA	NA	NA	NA	NA	NA	NA
McDowell et al. ChIPseq_CEBPB	fourHr	DegCre	NA	NA	NA	NA	NA	NA	NA	NA	NA	NA
McDowell et al. ChIPseq_CEBPB	fourHr	Nearest	NA	NA	NA	NA	NA	NA	NA	NA	NA	NA
McDowell et al. ChIPseq_CEBPB	fourHr	ABC	NA	NA	NA	NA	NA	NA	NA	NA	NA	NA
McDowell et al. ChIPseq_CEBPB	eightHr	DegCre	NA	NA	NA	NA	NA	NA	NA	NA	NA	NA
McDowell et al. ChIPseq_CEBPB	eightHr	Nearest	NA	NA	NA	NA	NA	NA	NA	NA	NA	NA
McDowell et al. ChIPseq_CEBPB	eightHr	ABC	NA	NA	NA	NA	NA	NA	NA	NA	NA	NA
McDowell et al. ChIPseq_CEBPB	twelveHR	DegCre	NA	NA	NA	NA	NA	NA	NA	NA	NA	NA
McDowell et al. ChIPseq_CEBPB	twelveHR	Nearest	NA	NA	NA	NA	NA	NA	NA	NA	NA	NA
McDowell et al. ChIPseq_CEBPB	twelveHR	ABC	NA	NA	NA	NA	NA	NA	NA	NA	NA	NA
McDowell et al. ChIPseq_cJun	twoHr	DegCre	NA	NA	NA	NA	NA	NA	NA	NA	NA	NA
McDowell et al. ChIPseq_cJun	twoHr	Nearest	NA	NA	NA	NA	NA	NA	NA	NA	NA	NA
McDowell et al. ChIPseq_cJun	twoHr	ABC	NA	NA	NA	NA	NA	NA	NA	NA	NA	NA
McDowell et al. ChIPseq_cJun	fourHr	DegCre	NA	NA	NA	NA	NA	NA	NA	NA	NA	NA
McDowell et al. ChIPseq_cJun	fourHr	Nearest	NA	NA	NA	NA	NA	NA	NA	NA	NA	NA
McDowell et al. ChIPseq_cJun	fourHr	ABC	NA	NA	NA	NA	NA	NA	NA	NA	NA	NA
McDowell et al. ChIPseq_cJun	eightHr	DegCre	NA	NA	NA	NA	NA	NA	NA	NA	NA	NA
McDowell et al. ChIPseq_cJun	eightHr	Nearest	NA	NA	NA	NA	NA	NA	NA	NA	NA	NA
McDowell et al. ChIPseq_cJun	eightHr	ABC	NA	NA	NA	NA	NA	NA	NA	NA	NA	NA
McDowell et al. ChIPseq_cJun	twelveHR	DegCre	0.392857	0.0952381	0.125	4	32	0.0770319	0.190476	1	0.763334	68
McDowell et al. ChIPseq_cJun	twelveHR	Nearest	0.482143	0.0625	0.125	4	32	0	0.125	1	0.681699	58
McDowell et al. ChIPseq_cJun	twelveHR	ABC	1	0.75	0.125	4	32	0.22956	1	1	0.000770732	0
McDowell et al. ChIPseq_EP300	twoHr	DegCre	NA	NA	NA	NA	NA	NA	NA	NA	NA	NA
McDowell et al. ChIPseq_EP300	twoHr	Nearest	NA	NA	NA	NA	NA	NA	NA	NA	NA	NA
McDowell et al. ChIPseq_EP300	twoHr	ABC	NA	NA	NA	NA	NA	NA	NA	NA	NA	NA
McDowell et al. ChIPseq_EP300	fourHr	DegCre	NA	NA	NA	NA	NA	NA	NA	NA	NA	NA
McDowell et al. ChIPseq_EP300	fourHr	Nearest	NA	NA	NA	NA	NA	NA	NA	NA	NA	NA
McDowell et al. ChIPseq_EP300	fourHr	ABC	NA	NA	NA	NA	NA	NA	NA	NA	NA	NA
McDowell et al. ChIPseq_EP300	eightHr	DegCre	NA	NA	NA	NA	NA	NA	NA	NA	NA	NA
McDowell et al. ChIPseq_EP300	eightHr	Nearest	NA	NA	NA	NA	NA	NA	NA	NA	NA	NA
McDowell et al. ChIPseq_EP300	eightHr	ABC	NA	NA	NA	NA	NA	NA	NA	NA	NA	NA
McDowell et al. ChIPseq_EP300	twelveHR	DegCre	0.95664	0.622685	0.18	9	50	0.182719	0.875	0.777778	1.07001e-05	16
McDowell et al. ChIPseq_EP300	twelveHR	Nearest	0.810298	0.490838	0.18	9	50	0.857092	0.833333	0.555556	0.000190748	70
McDowell et al. ChIPseq_EP300	twelveHR	ABC	1	0.888889	0.18	9	50	0.039714	1	1	1.67127e-06	0
McDowell et al. ChIPseq_GR	twoHr	DegCre	NA	NA	NA	NA	NA	NA	NA	NA	NA	NA
McDowell et al. ChIPseq_GR	twoHr	Nearest	NA	NA	NA	NA	NA	NA	NA	NA	NA	NA
McDowell et al. ChIPseq_GR	twoHr	ABC	NA	NA	NA	NA	NA	NA	NA	NA	NA	NA
McDowell et al. ChIPseq_GR	fourHr	DegCre	NA	NA	NA	NA	NA	NA	NA	NA	NA	NA
McDowell et al. ChIPseq_GR	fourHr	Nearest	NA	NA	NA	NA	NA	NA	NA	NA	NA	NA
McDowell et al. ChIPseq_GR	fourHr	ABC	NA	NA	NA	NA	NA	NA	NA	NA	NA	NA
McDowell et al. ChIPseq_GR	eightHr	DegCre	NA	NA	NA	NA	NA	NA	NA	NA	NA	NA
McDowell et al. ChIPseq_GR	eightHr	Nearest	NA	NA	NA	NA	NA	NA	NA	NA	NA	NA
McDowell et al. ChIPseq_GR	eightHr	ABC	NA	NA	NA	NA	NA	NA	NA	NA	NA	NA
McDowell et al. ChIPseq_GR	twelveHR	DegCre	0.925926	0.209295	0.25	6	24	0.257741	0.833333	0.833333	0.00117528	8
McDowell et al. ChIPseq_GR	twelveHR	Nearest	0.787037	0.393981	0.25	6	24	1.39254	0.8	0.666667	0.0181158	23
McDowell et al. ChIPseq_GR	twelveHR	ABC	0.972222	0.774306	0.25	6	24	0.051351	1	0.833333	5.20075e-05	3
McDowell et al. ChIPseq_H3K27ac	twoHr	DegCre	NA	NA	NA	NA	NA	NA	NA	NA	NA	NA
McDowell et al. ChIPseq_H3K27ac	twoHr	Nearest	NA	NA	NA	NA	NA	NA	NA	NA	NA	NA
McDowell et al. ChIPseq_H3K27ac	twoHr	ABC	NA	NA	NA	NA	NA	NA	NA	NA	NA	NA
McDowell et al. ChIPseq_H3K27ac	fourHr	DegCre	NA	NA	NA	NA	NA	NA	NA	NA	NA	NA
McDowell et al. ChIPseq_H3K27ac	fourHr	Nearest	NA	NA	NA	NA	NA	NA	NA	NA	NA	NA
McDowell et al. ChIPseq_H3K27ac	fourHr	ABC	NA	NA	NA	NA	NA	NA	NA	NA	NA	NA
McDowell et al. ChIPseq_H3K27ac	eightHr	DegCre	NA	NA	NA	NA	NA	NA	NA	NA	NA	NA
McDowell et al. ChIPseq_H3K27ac	eightHr	Nearest	NA	NA	NA	NA	NA	NA	NA	NA	NA	NA
McDowell et al. ChIPseq_H3K27ac	eightHr	ABC	NA	NA	NA	NA	NA	NA	NA	NA	NA	NA
McDowell et al. ChIPseq_H3K27ac	twelveHR	DegCre	NA	NA	NA	NA	NA	NA	NA	NA	NA	NA
McDowell et al. ChIPseq_H3K27ac	twelveHR	Nearest	NA	NA	NA	NA	NA	NA	NA	NA	NA	NA
McDowell et al. ChIPseq_H3K27ac	twelveHR	ABC	NA	NA	NA	NA	NA	NA	NA	NA	NA	NA
McDowell et al. ChIPseq_H3K4me1	twoHr	DegCre	NA	NA	NA	NA	NA	NA	NA	NA	NA	NA
McDowell et al. ChIPseq_H3K4me1	twoHr	Nearest	NA	NA	NA	NA	NA	NA	NA	NA	NA	NA
McDowell et al. ChIPseq_H3K4me1	twoHr	ABC	NA	NA	NA	NA	NA	NA	NA	NA	NA	NA
McDowell et al. ChIPseq_H3K4me1	fourHr	DegCre	NA	NA	NA	NA	NA	NA	NA	NA	NA	NA
McDowell et al. ChIPseq_H3K4me1	fourHr	Nearest	NA	NA	NA	NA	NA	NA	NA	NA	NA	NA
McDowell et al. ChIPseq_H3K4me1	fourHr	ABC	NA	NA	NA	NA	NA	NA	NA	NA	NA	NA
McDowell et al. ChIPseq_H3K4me1	eightHr	DegCre	NA	NA	NA	NA	NA	NA	NA	NA	NA	NA
McDowell et al. ChIPseq_H3K4me1	eightHr	Nearest	NA	NA	NA	NA	NA	NA	NA	NA	NA	NA
McDowell et al. ChIPseq_H3K4me1	eightHr	ABC	NA	NA	NA	NA	NA	NA	NA	NA	NA	NA
McDowell et al. ChIPseq_H3K4me1	twelveHR	DegCre	0.897163	0.0810458	0.0309278	3	97	0.104732	0.176471	1	0.00979281	28.5
McDowell et al. ChIPseq_H3K4me1	twelveHR	Nearest	0.448582	0.0399668	0.0309278	3	97	1.40521	0.142857	0.333333	0.627087	155.5
McDowell et al. ChIPseq_H3K4me1	twelveHR	ABC	0.964539	0.399573	0.0309278	3	97	0.039714	1	0.666667	0.00326902	10
McDowell et al. ChIPseq_H3K4me3	twoHr	DegCre	NA	NA	NA	NA	NA	NA	NA	NA	NA	NA
McDowell et al. ChIPseq_H3K4me3	twoHr	Nearest	NA	NA	NA	NA	NA	NA	NA	NA	NA	NA
McDowell et al. ChIPseq_H3K4me3	twoHr	ABC	NA	NA	NA	NA	NA	NA	NA	NA	NA	NA
McDowell et al. ChIPseq_H3K4me3	fourHr	DegCre	NA	NA	NA	NA	NA	NA	NA	NA	NA	NA
McDowell et al. ChIPseq_H3K4me3	fourHr	Nearest	NA	NA	NA	NA	NA	NA	NA	NA	NA	NA
McDowell et al. ChIPseq_H3K4me3	fourHr	ABC	NA	NA	NA	NA	NA	NA	NA	NA	NA	NA
McDowell et al. ChIPseq_H3K4me3	eightHr	DegCre	NA	NA	NA	NA	NA	NA	NA	NA	NA	NA
McDowell et al. ChIPseq_H3K4me3	eightHr	Nearest	NA	NA	NA	NA	NA	NA	NA	NA	NA	NA
McDowell et al. ChIPseq_H3K4me3	eightHr	ABC	NA	NA	NA	NA	NA	NA	NA	NA	NA	NA
McDowell et al. ChIPseq_H3K4me3	twelveHR	DegCre	NA	NA	NA	NA	NA	NA	NA	NA	NA	NA
McDowell et al. ChIPseq_H3K4me3	twelveHR	Nearest	NA	NA	NA	NA	NA	NA	NA	NA	NA	NA
McDowell et al. ChIPseq_H3K4me3	twelveHR	ABC	NA	NA	NA	NA	NA	NA	NA	NA	NA	NA
McDowell et al. DNAse	twoHr	DegCre	NA	NA	NA	NA	NA	NA	NA	NA	NA	NA
McDowell et al. DNAse	twoHr	Nearest	NA	NA	NA	NA	NA	NA	NA	NA	NA	NA
McDowell et al. DNAse	twoHr	ABC	NA	NA	NA	NA	NA	NA	NA	NA	NA	NA
McDowell et al. DNAse	fourHr	DegCre	NA	NA	NA	NA	NA	NA	NA	NA	NA	NA
McDowell et al. DNAse	fourHr	Nearest	NA	NA	NA	NA	NA	NA	NA	NA	NA	NA
McDowell et al. DNAse	fourHr	ABC	NA	NA	NA	NA	NA	NA	NA	NA	NA	NA
McDowell et al. DNAse	eightHr	DegCre	NA	NA	NA	NA	NA	NA	NA	NA	NA	NA
McDowell et al. DNAse	eightHr	Nearest	NA	NA	NA	NA	NA	NA	NA	NA	NA	NA
McDowell et al. DNAse	eightHr	ABC	NA	NA	NA	NA	NA	NA	NA	NA	NA	NA
McDowell et al. DNAse	twelveHR	DegCre	0.951713	0.0459236	0.0272727	3	110	0.272989	1	0.666667	0.00399854	15.5
McDowell et al. DNAse	twelveHR	Nearest	0.767913	0.148295	0.0272727	3	110	1.576	0.4	0.666667	0.0252262	74.5
McDowell et al. DNAse	twelveHR	ABC	0.943925	0.322612	0.0272727	3	110	0.039714	0.666667	0.666667	0.0045803	18
