# Supplementary material for: Probabilistic association of differentially expressed genes withcis-regulatory elements
Source: HighWire-hosted journal article supplement (doi:10.1101/gr.278598.123), 2024-04-17
Supplement: Supplemental_Data_4.xlsx [file Supplemental_Data_4.xlsx]

## Sheet: compareGapserSummStatsV3
#Supplemental Data 4. Peformance summary of DegCre or Nearest DEG predictions compared to CRISPR data from Gasperini et al. "analysisType" defines the type of prediction. "nReg" is the number of associations that are "regulated" in the CRISPR data. "TotAssocs" is the total number of intersecting associations. "best Thresh", "bestPPV", and "best TPR" are the values at the highest F1-score.
dataSet	expName	analysisType	ROCauc	PRauc	zeroSkill	nReg	TotAssocs	bestThresh	bestPPV	bestTPR	wilcoxP	wilcoxStat
Hiatt et al. ZMYM3_CETCh_CONCORD	R1274WmutVsCntrl	DegCre	0.772339	0.218058	0.111801	18	161	0.041219	0.2125	0.944444	8.56508e-05	586
Hiatt et al. ZMYM3_CETCh_CONCORD	R1274WmutVsCntrl	Nearest	0.62704	0.178404	0.111801	18	161	0	0.111801	1	0.0367617	960
Hiatt et al. ZMYM3_CETCh_CONCORD	R688HmutVsCntrl	DegCre	NA	NA	NA	NA	NA	NA	NA	NA	NA	NA
Hiatt et al. ZMYM3_CETCh_CONCORD	R688HmutVsCntrl	Nearest	NA	NA	NA	NA	NA	NA	NA	NA	NA	NA
Hiatt et al. ZMYM3_CETCh_DISCORD	R1274WmutVsCntrl	DegCre	0.925342	0.501422	0.142857	41	287	0.0735716	0.672727	0.902439	1.40655e-18	753
Hiatt et al. ZMYM3_CETCh_DISCORD	R1274WmutVsCntrl	Nearest	0.577037	0.157696	0.142857	41	287	0.00587691	0.20625	0.804878	0.0493266	4266
Hiatt et al. ZMYM3_CETCh_DISCORD	R688HmutVsCntrl	DegCre	NA	NA	NA	NA	NA	NA	NA	NA	NA	NA
Hiatt et al. ZMYM3_CETCh_DISCORD	R688HmutVsCntrl	Nearest	NA	NA	NA	NA	NA	NA	NA	NA	NA	NA
Hiatt et al. ZMYM3_CETCh	R1274WmutVsCntrl	DegCre	0.920831	0.464332	0.131696	59	448	0.0567372	0.52381	0.932203	9.82207e-26	1817
Hiatt et al. ZMYM3_CETCh	R1274WmutVsCntrl	Nearest	0.640756	0.179051	0.131696	59	448	0.00587691	0.207965	0.79661	9.99496e-05	8245
Hiatt et al. ZMYM3_CETCh	R688HmutVsCntrl	DegCre	NA	NA	NA	NA	NA	NA	NA	NA	NA	NA
Hiatt et al. ZMYM3_CETCh	R688HmutVsCntrl	Nearest	NA	NA	NA	NA	NA	NA	NA	NA	NA	NA
Savic et al. H3K27ac	Rosig_24hr	DegCre	0.855698	0.335065	0.0691358	56	810	0.158074	0.29932	0.785714	3.02362e-19	6092
Savic et al. H3K27ac	Rosig_24hr	Nearest	0.691029	0.167591	0.0691358	56	810	1.24001	0.276923	0.321429	3.68216e-09	13046
Savic et al. H3K27ac	Rosig_48hr	DegCre	0.817371	0.367061	0.0689362	81	1175	0.204139	0.36646	0.728395	6.91758e-22	16183.5
Savic et al. H3K27ac	Rosig_48hr	Nearest	0.652431	0.145925	0.0689362	81	1175	0.431732	0.183673	0.444444	1.75944e-09	30799.5
Savic et al. RNA_Pol2	Rosig_24hr	DegCre	0.872494	0.283141	0.0631692	59	934	0.140611	0.28	0.830508	4.49351e-22	6582.5
Savic et al. RNA_Pol2	Rosig_24hr	Nearest	0.560581	0.0779874	0.0631692	59	934	0	0.0631692	1	0.0225542	22685
Savic et al. RNA_Pol2	Rosig_48hr	DegCre	0.811556	0.230213	0.0494269	69	1396	0.196697	0.238532	0.753623	1.19286e-18	17254.5
Savic et al. RNA_Pol2	Rosig_48hr	Nearest	0.617952	0.0827917	0.0494269	69	1396	0	0.0494269	1	6.11658e-06	34981.5
Reed et al. ATAC	minute30	DegCre	0.613839	0.263426	0.179487	14	78	0.00903913	0.289474	0.785714	0.0931172	346
Reed et al. ATAC	minute30	Nearest	0.541853	0.211741	0.179487	14	78	0	0.179487	1	0.312096	410.5
Reed et al. ATAC	min60	DegCre	0.772066	0.226351	0.0807692	21	260	0.0444728	0.239437	0.809524	1.80249e-05	1144
Reed et al. ATAC	min60	Nearest	0.609982	0.123141	0.0807692	21	260	2.41323	0.161765	0.52381	0.0441037	1957.5
Reed et al. ATAC	min90	DegCre	0.809201	0.197398	0.0643016	29	451	0.0712335	0.204724	0.896552	1.25443e-08	2335
Reed et al. ATAC	min90	Nearest	0.699134	0.107412	0.0643016	29	451	0.387784	0.124402	0.896552	9.98809e-05	3682
Reed et al. ATAC	min120	DegCre	0.843813	0.213408	0.0469484	50	1065	0.125714	0.190244	0.78	1.03886e-16	7926.5
Reed et al. ATAC	min120	Nearest	0.666709	0.0785336	0.0469484	50	1065	0.186964	0.0835322	0.7	6.37069e-06	16914.5
Reed et al. ATAC	min240	DegCre	0.857625	0.328396	0.0472773	112	2369	0.260294	0.262458	0.705357	8.81765e-38	35990
Reed et al. ATAC	min240	Nearest	0.683882	0.0974417	0.0472773	112	2369	0.0128791	0.103048	0.633929	1.70839e-16	79909.5
Reed et al. ATAC	min360	DegCre	0.847044	0.309896	0.0525687	132	2511	0.276403	0.277946	0.69697	1.72676e-41	48032.5
Reed et al. ATAC	min360	Nearest	0.664243	0.0998536	0.0525687	132	2511	0.0463938	0.113095	0.575758	4.36352e-16	105437
Reed et al. ATAC	min1440	DegCre	0.875473	0.354481	0.0567854	236	4156	0.428973	0.465278	0.567797	3.60915e-84	115202
Reed et al. ATAC	min1440	Nearest	0.633705	0.106216	0.0567854	236	4156	0.0199917	0.135309	0.444915	2.30289e-24	338866
Reed et al. H3K27ac	minute30	DegCre	0.598214	0.364872	0.275862	16	58	0.0138719	0.423077	0.6875	0.127149	270
Reed et al. H3K27ac	minute30	Nearest	0.423363	0.253893	0.275862	16	58	0	0.275862	1	0.817327	387.5
Reed et al. H3K27ac	min60	DegCre	0.695019	0.249696	0.145038	19	131	0.0304928	0.3125	0.789474	0.00337066	649
Reed et al. H3K27ac	min60	Nearest	0.571664	0.214645	0.145038	19	131	0	0.145038	1	0.159385	911.5
Reed et al. H3K27ac	min90	DegCre	0.783333	0.270384	0.105431	33	313	0.0473936	0.25	0.848485	5.09536e-08	2002
Reed et al. H3K27ac	min90	Nearest	0.690909	0.218011	0.105431	33	313	2.3225	0.16	0.848485	0.000136662	2856
Reed et al. H3K27ac	min120	DegCre	0.761576	0.25436	0.0726979	45	619	0.122308	0.245763	0.644444	2.48448e-09	6158.5
Reed et al. H3K27ac	min120	Nearest	0.68885	0.191235	0.0726979	45	619	0.419505	0.108696	0.888889	7.04046e-06	8037
Reed et al. H3K27ac	min240	DegCre	0.868533	0.406174	0.0697236	111	1592	0.284213	0.395	0.711712	9.21298e-39	21612
Reed et al. H3K27ac	min240	Nearest	0.754153	0.188506	0.0697236	111	1592	0.836237	0.165399	0.783784	9.94906e-25	40415
Reed et al. H3K27ac	min360	DegCre	0.865668	0.408961	0.0727368	139	1911	0.326061	0.388	0.697842	3.60341e-47	33087
Reed et al. H3K27ac	min360	Nearest	0.756788	0.201583	0.0727368	139	1911	0.161785	0.17134	0.791367	5.34482e-33	59905
Reed et al. H3K27ac	min1440	DegCre	0.867588	0.452305	0.0738302	213	2885	0.448176	0.433243	0.746479	8.17701e-72	75360.5
Reed et al. H3K27ac	min1440	Nearest	0.800694	0.244935	0.0738302	213	2885	0.376703	0.200688	0.821596	1.08175e-71	113432
Sanchez-Priego et al. ATAC	H1_Glu_early	DegCre	0.933333	0.25	0.0909091	3	33	0.0302121	0.5	1	0.00792887	6
Sanchez-Priego et al. ATAC	H1_Glu_early	Nearest	0.977778	0.416667	0.0909091	3	33	16.8696	0.75	1	0.00374264	2
Sanchez-Priego et al. ATAC	H1_Glu_late	DegCre	0.902222	0.235189	0.0585774	14	239	0.0827141	0.305556	0.785714	2.25654e-07	308
Sanchez-Priego et al. ATAC	H1_Glu_late	Nearest	0.664762	0.0772947	0.0585774	14	239	0.197501	0.0952381	1	0.0174817	1056
Sanchez-Priego et al. ATAC	H1_Gaba_early	DegCre	0.9425	0.403625	0.0963855	8	83	0.058219	0.533333	1	2.16382e-05	34.5
Sanchez-Priego et al. ATAC	H1_Gaba_early	Nearest	0.875833	0.344011	0.0963855	8	83	5.25275	0.5	0.75	0.000248689	74.5
Sanchez-Priego et al. ATAC	H1_Gaba_late	DegCre	0.800157	0.232027	0.0554245	47	848	0.190652	0.226562	0.617021	2.20173e-12	7523.5
Sanchez-Priego et al. ATAC	H1_Gaba_late	Nearest	0.663811	0.0828233	0.0554245	47	848	0.0720068	0.0941476	0.787234	2.05029e-05	12656.5
Sanchez-Priego et al. H3K27ac_CUTRUN	H1_Glu_early	DegCre	0.969697	0.236111	0.214286	3	14	0.00197336	0.75	1	0.0092945	1
Sanchez-Priego et al. H3K27ac_CUTRUN	H1_Glu_early	Nearest	1	0.333333	0.214286	3	14	0.423202	1	1	0.00182084	0
Sanchez-Priego et al. H3K27ac_CUTRUN	H1_Glu_late	DegCre	0.524676	0.100858	0.104348	12	115	0.014694	0.136364	1	0.391856	587.5
Sanchez-Priego et al. H3K27ac_CUTRUN	H1_Glu_late	Nearest	0.713188	0.179878	0.104348	12	115	0.0535118	0.188679	0.833333	0.00469365	354.5
Sanchez-Priego et al. H3K27ac_CUTRUN	H1_Gaba_early	DegCre	0.743056	0.207049	0.129032	8	62	0.00868704	0.258065	1	0.0140804	111
Sanchez-Priego et al. H3K27ac_CUTRUN	H1_Gaba_early	Nearest	0.480324	0.115171	0.129032	8	62	0	0.129032	1	0.576228	224.5
Sanchez-Priego et al. H3K27ac_CUTRUN	H1_Gaba_late	DegCre	0.919589	0.495832	0.0681818	39	572	0.170363	0.707317	0.74359	1.02849e-18	1671.5
Sanchez-Priego et al. H3K27ac_CUTRUN	H1_Gaba_late	Nearest	0.669072	0.137157	0.0681818	39	572	0.00146875	0.132275	0.641026	1.24172e-05	6879
Sanchez-Priego et al. H3K27ac_CUTRUN	F2_Glu_early	DegCre	NA	NA	NA	NA	NA	NA	NA	NA	NA	NA
Sanchez-Priego et al. H3K27ac_CUTRUN	F2_Glu_early	Nearest	NA	NA	NA	NA	NA	NA	NA	NA	NA	NA
Sanchez-Priego et al. H3K27ac_CUTRUN	F2_Glu_late	DegCre	NA	NA	NA	NA	NA	NA	NA	NA	NA	NA
Sanchez-Priego et al. H3K27ac_CUTRUN	F2_Glu_late	Nearest	NA	NA	NA	NA	NA	NA	NA	NA	NA	NA
Sanchez-Priego et al. H3K27ac_CUTRUN	F2_Gaba_early	DegCre	0.51087	0.138187	0.148148	4	27	0.00657439	0.25	1	0.486376	45
Sanchez-Priego et al. H3K27ac_CUTRUN	F2_Gaba_early	Nearest	0.391304	0.112351	0.148148	4	27	0.19879	0.190476	1	0.763543	56
Sanchez-Priego et al. H3K27ac_CUTRUN	F2_Gaba_late	DegCre	0.843946	0.243149	0.0783699	25	319	0.074026	0.227723	0.92	5.67887e-09	1147
Sanchez-Priego et al. H3K27ac_CUTRUN	F2_Gaba_late	Nearest	0.674422	0.122562	0.0783699	25	319	0.303535	0.136986	0.8	0.00107439	2393
Rogers et al. ATAC	cluster1v2	DegCre	0.897288	0.432017	0.0687623	35	509	0.105869	0.45614	0.742857	2.10084e-15	1704
Rogers et al. ATAC	cluster1v2	Nearest	0.774231	0.144392	0.0687623	35	509	21.9991	0.184932	0.771429	1.50022e-08	3745.5
Rogers et al. ATAC	cluster1v3	DegCre	0.902936	0.465314	0.0721154	45	624	0.165147	0.555556	0.777778	1.01343e-19	2529
Rogers et al. ATAC	cluster1v3	Nearest	0.696834	0.105917	0.0721154	45	624	2.38861	0.138408	0.888889	2.97985e-06	7899
Rogers et al. ATAC	cluster2v3	DegCre	0.855114	0.343627	0.0628571	22	350	0.154651	0.421053	0.727273	1.22635e-08	1045.5
Rogers et al. ATAC	cluster2v3	Nearest	0.71092	0.167675	0.0628571	22	350	0.593252	0.10101	0.909091	0.000377274	2086
McDowell et al. ChIPseq_BCL3	twoHr	DegCre	0.769936	0.203339	0.088	11	125	0.0269841	0.209302	0.818182	0.00160789	288.5
McDowell et al. ChIPseq_BCL3	twoHr	Nearest	0.685805	0.159261	0.088	11	125	0.0251636	0.2	0.636364	0.00524344	394
McDowell et al. ChIPseq_BCL3	fourHr	DegCre	0.803881	0.17387	0.0829493	18	217	0.0617781	0.225352	0.888889	9.97388e-06	702.5
McDowell et al. ChIPseq_BCL3	fourHr	Nearest	0.606086	0.137765	0.0829493	18	217	0	0.0829493	1	0.029552	1411
McDowell et al. ChIPseq_BCL3	eightHr	DegCre	0.916092	0.265118	0.0543478	10	184	0.110323	0.391304	0.9	4.98704e-06	146
McDowell et al. ChIPseq_BCL3	eightHr	Nearest	0.832471	0.214138	0.0543478	10	184	0.864426	0.235294	0.8	2.46245e-05	291.5
McDowell et al. ChIPseq_BCL3	twelveHR	DegCre	0.895446	0.369532	0.0765027	28	366	0.112989	0.306667	0.821429	1.75384e-12	989.5
McDowell et al. ChIPseq_BCL3	twelveHR	Nearest	0.710746	0.209825	0.0765027	28	366	0.405042	0.317073	0.464286	9.86985e-08	2737.5
McDowell et al. ChIPseq_CEBPB	twoHr	DegCre	0.756757	0.160392	0.075	6	80	0.0425373	0.2	0.833333	0.0190241	108
McDowell et al. ChIPseq_CEBPB	twoHr	Nearest	0.638514	0.137205	0.075	6	80	0.525805	0.3	0.5	0.0815588	160.5
McDowell et al. ChIPseq_CEBPB	fourHr	DegCre	0.789903	0.170396	0.0597015	12	201	0.0859857	0.15625	0.833333	0.000385468	476.5
McDowell et al. ChIPseq_CEBPB	fourHr	Nearest	0.567681	0.0928089	0.0597015	12	201	0.624714	0.235294	0.333333	0.149308	980.5
McDowell et al. ChIPseq_CEBPB	eightHr	DegCre	0.8948	0.24787	0.0740741	10	135	0.0763094	0.322581	1	1.71961e-05	131.5
McDowell et al. ChIPseq_CEBPB	eightHr	Nearest	0.6748	0.138321	0.0740741	10	135	1.44406	0.25	0.4	0.0216572	406.5
McDowell et al. ChIPseq_CEBPB	twelveHR	DegCre	0.880244	0.17983	0.0526316	14	266	0.109384	0.179487	1	8.48337e-07	422.5
McDowell et al. ChIPseq_CEBPB	twelveHR	Nearest	0.633362	0.089867	0.0526316	14	266	0.172887	0.122807	0.5	0.0130478	1293.5
McDowell et al. ChIPseq_cJun	twoHr	DegCre	0.825	0.333059	0.0625	8	128	0.208333	0.75	0.375	0.00108203	168
McDowell et al. ChIPseq_cJun	twoHr	Nearest	0.691146	0.132085	0.0625	8	128	1.63831	0.238095	0.625	0.016717	296.5
McDowell et al. ChIPseq_cJun	fourHr	DegCre	0.869587	0.295176	0.062069	18	290	0.179816	0.352941	0.666667	7.59682e-08	638.5
McDowell et al. ChIPseq_cJun	fourHr	Nearest	0.778186	0.154327	0.062069	18	290	0.793066	0.213115	0.722222	1.93067e-06	1086
McDowell et al. ChIPseq_cJun	eightHr	DegCre	0.890214	0.179771	0.05	8	160	0.113143	0.3	0.75	0.00010302	133.5
McDowell et al. ChIPseq_cJun	eightHr	Nearest	0.784539	0.164635	0.05	8	160	0.510546	0.206897	0.75	0.00023673	262
McDowell et al. ChIPseq_cJun	twelveHR	DegCre	0.859027	0.24676	0.0583554	22	377	0.228704	0.37931	0.5	7.91058e-09	1101
McDowell et al. ChIPseq_cJun	twelveHR	Nearest	0.668758	0.118317	0.0583554	22	377	0.267293	0.169014	0.545455	0.000169683	2587
McDowell et al. ChIPseq_EP300	twoHr	DegCre	0.650858	0.0964373	0.0681818	9	132	0.0306452	0.12963	0.777778	0.066366	386.5
McDowell et al. ChIPseq_EP300	twoHr	Nearest	0.551491	0.0741098	0.0681818	9	132	0	0.0681818	1	0.278118	496.5
McDowell et al. ChIPseq_EP300	fourHr	DegCre	0.715222	0.0967754	0.0606061	16	264	0.0568363	0.106667	1	0.00196619	1130
McDowell et al. ChIPseq_EP300	fourHr	Nearest	0.53251	0.0639226	0.0606061	16	264	0	0.0606061	1	0.303681	1855
McDowell et al. ChIPseq_EP300	eightHr	DegCre	0.818658	0.225855	0.0701754	12	171	0.161632	0.416667	0.416667	0.000119495	346
McDowell et al. ChIPseq_EP300	eightHr	Nearest	0.714623	0.174399	0.0701754	12	171	0.669702	0.333333	0.5	0.00230143	544.5
McDowell et al. ChIPseq_EP300	twelveHR	DegCre	0.857463	0.201805	0.0473934	20	422	0.154734	0.2	0.65	3.37351e-08	1146
McDowell et al. ChIPseq_EP300	twelveHR	Nearest	0.628172	0.0967695	0.0473934	20	422	0.859014	0.2	0.45	0.0107366	2989.5
McDowell et al. ChIPseq_GR	twoHr	DegCre	0.666344	0.13157	0.0851064	12	141	0.0262799	0.123711	1	0.0287876	516.5
McDowell et al. ChIPseq_GR	twoHr	Nearest	0.52261	0.088629	0.0851064	12	141	0.255977	0.113208	1	0.39892	739
McDowell et al. ChIPseq_GR	fourHr	DegCre	0.736606	0.115737	0.0594406	17	286	0.0592531	0.0977011	1	0.000537292	1204.5
McDowell et al. ChIPseq_GR	fourHr	Nearest	0.602887	0.0796352	0.0594406	17	286	0.10607	0.0948905	0.764706	0.0662455	1816
McDowell et al. ChIPseq_GR	eightHr	DegCre	0.781945	0.2017	0.0714286	11	154	0.266	0.5	0.272727	0.000941947	343
McDowell et al. ChIPseq_GR	eightHr	Nearest	0.593134	0.125368	0.0714286	11	154	8.95559	0.3	0.272727	0.144705	640
McDowell et al. ChIPseq_GR	twelveHR	DegCre	0.769033	0.160995	0.0591549	21	355	0.136487	0.168539	0.714286	1.76965e-05	1620
McDowell et al. ChIPseq_GR	twelveHR	Nearest	0.571357	0.0953818	0.0591549	21	355	0	0.0591549	1	0.115413	3006.5
McDowell et al. ChIPseq_H3K27ac	twoHr	DegCre	0.737208	0.16229	0.0913978	17	186	0.0346603	0.223881	0.882353	0.000643751	755
McDowell et al. ChIPseq_H3K27ac	twoHr	Nearest	0.594675	0.113083	0.0913978	17	186	0.206174	0.15625	0.588235	0.0710049	1164.5
McDowell et al. ChIPseq_H3K27ac	fourHr	DegCre	0.777334	0.130995	0.0691824	22	318	0.077583	0.172727	0.863636	7.1387e-06	1450
McDowell et al. ChIPseq_H3K27ac	fourHr	Nearest	0.596207	0.0806296	0.0691824	22	318	0.0398332	0.115942	0.727273	0.0481661	2629.5
McDowell et al. ChIPseq_H3K27ac	eightHr	DegCre	0.764482	0.136095	0.0681818	12	176	0.0471018	0.161765	0.916667	0.00113512	463.5
McDowell et al. ChIPseq_H3K27ac	eightHr	Nearest	0.587144	0.0829066	0.0681818	12	176	0	0.0681818	1	0.12416	812.5
McDowell et al. ChIPseq_H3K27ac	twelveHR	DegCre	0.861582	0.278935	0.0539906	23	426	0.0995904	0.204301	0.826087	2.6887e-09	1283
McDowell et al. ChIPseq_H3K27ac	twelveHR	Nearest	0.600119	0.07567	0.0539906	23	426	0	0.0539906	1	0.0214773	3706.5
McDowell et al. ChIPseq_H3K4me1	twoHr	DegCre	0.682071	0.128922	0.0677966	12	177	0.0355548	0.142857	0.666667	0.0178116	629.5
McDowell et al. ChIPseq_H3K4me1	twoHr	Nearest	0.632071	0.0927632	0.0677966	12	177	0.00584903	0.103448	0.75	0.0511122	728.5
McDowell et al. ChIPseq_H3K4me1	fourHr	DegCre	0.667472	0.0647997	0.0416667	9	216	0.0393103	0.0689655	0.888889	0.0448343	619.5
McDowell et al. ChIPseq_H3K4me1	fourHr	Nearest	0.597692	0.0719848	0.0416667	9	216	2.99262	0.222222	0.222222	0.158327	749.5
McDowell et al. ChIPseq_H3K4me1	eightHr	DegCre	0.762743	0.144129	0.0720721	8	111	0.0583083	0.24	0.75	0.00688519	195.5
McDowell et al. ChIPseq_H3K4me1	eightHr	Nearest	0.666869	0.100252	0.0720721	8	111	0.499003	0.155556	0.875	0.0551039	274.5
McDowell et al. ChIPseq_H3K4me1	twelveHR	DegCre	0.820793	0.0642715	0.022869	11	481	0.108757	0.10101	0.909091	0.000137173	926.5
McDowell et al. ChIPseq_H3K4me1	twelveHR	Nearest	0.512573	0.0225893	0.022869	11	481	0	0.022869	1	0.440485	2520
McDowell et al. ChIPseq_H3K4me3	twoHr	DegCre	0.776772	0.145148	0.0729927	10	137	0.0218925	0.235294	0.8	0.00183629	283.5
McDowell et al. ChIPseq_H3K4me3	twoHr	Nearest	0.375197	0.0496048	0.0729927	10	137	0	0.0729927	1	0.925736	793.5
McDowell et al. ChIPseq_H3K4me3	fourHr	DegCre	0.664583	0.0714874	0.0506329	8	158	0.0270679	0.0958904	0.875	0.0591007	402.5
McDowell et al. ChIPseq_H3K4me3	fourHr	Nearest	0.518333	0.0581575	0.0506329	8	158	0	0.0506329	1	0.429961	578
McDowell et al. ChIPseq_H3K4me3	eightHr	DegCre	NA	NA	NA	NA	NA	NA	NA	NA	NA	NA
McDowell et al. ChIPseq_H3K4me3	eightHr	Nearest	NA	NA	NA	NA	NA	NA	NA	NA	NA	NA
McDowell et al. ChIPseq_H3K4me3	twelveHR	DegCre	0.863653	0.201382	0.0351759	14	398	0.235569	0.384615	0.357143	1.89151e-06	733
McDowell et al. ChIPseq_H3K4me3	twelveHR	Nearest	0.516741	0.0382473	0.0351759	14	398	0	0.0351759	1	0.399511	2598
McDowell et al. DNAse	twoHr	DegCre	0.766791	0.103859	0.0382775	8	209	0.0420829	0.173913	0.5	0.00531627	375
McDowell et al. DNAse	twoHr	Nearest	0.67102	0.0754186	0.0382775	8	209	1.59844	0.166667	0.375	0.0414506	529
McDowell et al. DNAse	fourHr	DegCre	0.790711	0.082945	0.0386364	17	440	0.0588287	0.0993789	0.941176	2.39492e-05	1505
McDowell et al. DNAse	fourHr	Nearest	0.570644	0.0505688	0.0386364	17	440	0	0.0386364	1	0.133177	3087.5
McDowell et al. DNAse	eightHr	DegCre	0.845885	0.111783	0.0366492	7	191	0.033365	0.114754	1	0.000967681	198.5
McDowell et al. DNAse	eightHr	Nearest	0.532997	0.0527428	0.0366492	7	191	0	0.0366492	1	0.374676	601.5
McDowell et al. DNAse	twelveHR	DegCre	0.829372	0.141238	0.0378549	24	634	0.0907398	0.147287	0.791667	2.15117e-08	2498
McDowell et al. DNAse	twelveHR	Nearest	0.645765	0.0694288	0.0378549	24	634	0.407491	0.101695	0.5	0.0024357	5186
