# Supplementary material for: Probabilistic association of differentially expressed genes withcis-regulatory elements
Source: HighWire-hosted journal article supplement (doi:10.1101/gr.278598.123), 2024-04-17
Supplement: Supplemental_Data_5.xlsx [file Supplemental_Data_5.xlsx]

## Sheet: DegCreAndSignacCompareGapserSum
#Supplemental Data 5. Peformance summary of DegCre or Signac predictions from single-nuclei ATAC-seq and RNA-seq compared to CRISPR data from Gasperini et al. "analysisType" defines the type of prediction. "nReg" is the number of associations that are "regulated" in the CRISPR data. "TotAssocs" is the total number of intersecting associations. "best Thresh", "bestPPV", and "best TPR" are the valu…
expName	analysisType	ROCauc	PRauc	zeroSkill	nReg	TotAssocs	bestThresh	bestPPV	bestTPR	wilcoxP	wilcoxStat
cluster1v2	DegCre	0.8575	0.448453	0.0943396	25	265	0.147778	0.586207	0.68	2.04473e-09	855
cluster1v2	Signac	0.4835	0.0838668	0.0943396	25	265	0.783148	0.105932	1	0.60751	3099
cluster1v3	DegCre	0.923351	0.536267	0.123494	41	332	0.165147	0.573529	0.95122	8.36086e-19	914.5
cluster1v3	Signac	0.51999	0.117263	0.123494	41	332	0.216236	0.125	1	0.339574	5727
cluster2v3	DegCre	0.862282	0.409915	0.122449	24	196	0.154651	0.381818	0.875	4.64525e-09	568.5
cluster2v3	Signac	0.560804	0.23171	0.122449	24	196	4.02939	0.8	0.166667	0.167952	1813
